# Supplementary material
Source: Elsevier journal article supplement (https://www.sciencedirect.com/science/article/pii/S234128791930033X)
Supplement: mmc1 [file S234128791930033X:mmc1.docx]

**MATERIAL ON LINE: TABLAS**

**Tabla S1.** Manifestaciones clínicasde los tres síndromes principales de APLV no mediada por IgE (modificado de Nowak-Węgrzyn et al)17.

|  | **Proctocolitis** | **FPIES** | **Enteropatía** |
| --- | --- | --- | --- |
| Edad de aparición más frecuente | < 6 meses | Dependiendo de la edad de introducción del alimento | Dependiendo de la edad de introducción del alimento |
| Otros alimentos que lo pueden ocasionar además de la LV | Soja, huevo, trigo | Pescado, arroz, huevo, soja, avena, pollo. | Soja, huevo, trigo |
| > 2 alimentos implicados | < 20% (lo más frecuente LV + soja) | < 35-40% (lo más frecuente LV +soja) | Raro |
| Antecedentes de atopia |  |  |  |
| Familiares | < 25% | 40-70% | Desconocido |
| Personales | < 20% | < 30% | < 22% |
| Transición a mecanismo IgE | Raro | 25% | Raro |
| Clínica con LM exclusiva | 60% | Raro | Desconocido |
| Sintomatología  Vómitos  Diarrea  Sangre en heces  Fallo de medro  Shock  Hipotermia | No  Leve  Sí  Ausente  Ausente  Ausente | Abundantes  Profusa (FPIESc)  Si (FPIESc)  Moderado-grave (FPIESc)  15%  Presente < 25% | Intermitentes  Moderada  Rara  Moderado  Ausente  Ausente |
| Lesión histológica* | Afectación de colon parcheada con HNL e infiltrado de eosinófilos (>60 eos/cga) formando abcesos en criptas | FPIESc: afectación parcheada de tramos altos y colon muy variable (incluyendo ulceras, atrofia vellositaria e infiltrado de eosinofilos) | Afectación de tramos altos parcheada, muy variable (desde lesiones mínimas a HNL y atrofia vellositaria) |
| Desarrollo de tolerancia a PLV | La mayoría antes de los 12 meses | La mayoría entre los 3-5 años | La mayoría entre los 12 y 36 meses |

FPIESc: FPIES crónico, LM lactancia materna, LV leche de vaca, eos/cga: eosinófilos/campo de gran aumento, HNL hiperplasia nodular linfoide.

*No se recomienda la realización sistemática de una endoscopia digestiva. Su indicación queda a criterio del gastroenterólogo en casos de dudas en el diagnóstico o mala respuesta a la dieta de exclusión.

**Tabla S2.** Interpretación de la prueba de provocación en casos de FPIES. (modificado de Nowak-Węgrzyn et al)9.

| **Criterios diagnósticos para la interpretación de la prueba de provocación con PLV.**  *Se requiere la presencia del criterio mayor y al menos 2 criterios menores para considerar la prueba positiva* |
| --- |
| **Criterio mayor:**  Vómitos en el período de 1 a 4 horas después de la ingestión de proteínas de leche de vaca y ausencia de síntomas clásicos cutáneos o respiratorios mediados por IgE  **Criterios menores:**  Letargia  Palidez  Diarrea a las 5-10 horas (< 24 h) después de la ingestión de leche de vaca  Hipotensión  Hipotermia (temperatura < 35º)  Incremento > 1500 neutrófilos por encima del nivel basal |
| **Fármacos a administrar en casos de prueba de provocación positiva** |
| Es prioritario el mantenimiento de la volemia.  En casos leves: hidratación oral con LM o con solución de rehidratación oral  En casos moderados/graves: sueroterapia (suero fisiológico 0.9%: 20 ml/kg)  Metilprednisolona* 1 mg/kg (máximo: 60-80 mg/dosis)  Ondansetron** (en mayores de 6 meses) 0.15 mg/kg/dosis (máximo 8 mg/dosis)  *En casos moderados-graves.  **Eficacia limitada a series pequeñas. |
